# Supplementary material for: A low-cost device for measuring local magnetic anomalies in volcanic terrain
Source: Copernicus journal article supplement (doi:10.5194/gi-8-217-2019), 2019-08-22
Supplement: Supplementary file [file gi-8-217-2019-supplement-title-page.pdf › gi-8-217-2019-supplement-title-page.pdf]

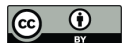

## *Supplement of*

# **A low-cost device for measuring local magnetic anomalies in volcanic terrain**

**Bertwin M. de Groot and Lennart V. de Groot**

*Correspondence to:* Bertwin M. de Groot ([b.m.degroot@uu.nl](mailto:b.m.degroot@uu.nl))

- [gi-8-217-2019-supplement-title-page.pdf](#)
- [Mt-Etna\\_data.xlsx](#)

The copyright of individual parts of the supplement might differ from the CC BY 4.0 License.
